# Supplementary material
Source: PubMed Central journal article supplement (PMC1765483)

**A**

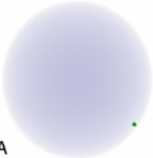

**B**

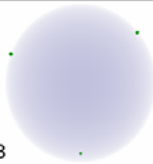

**C**

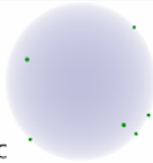

**D**

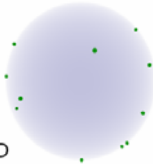

Supplement: pnas_0607919104_1.pdf [file pnas_0607919104_1.pdf]

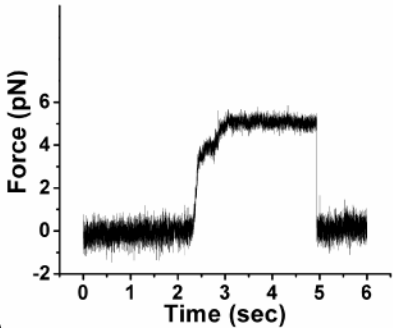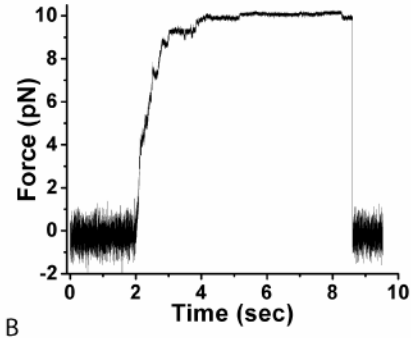

Supplement: pnas_0607919104_2.pdf [file pnas_0607919104_2.pdf]

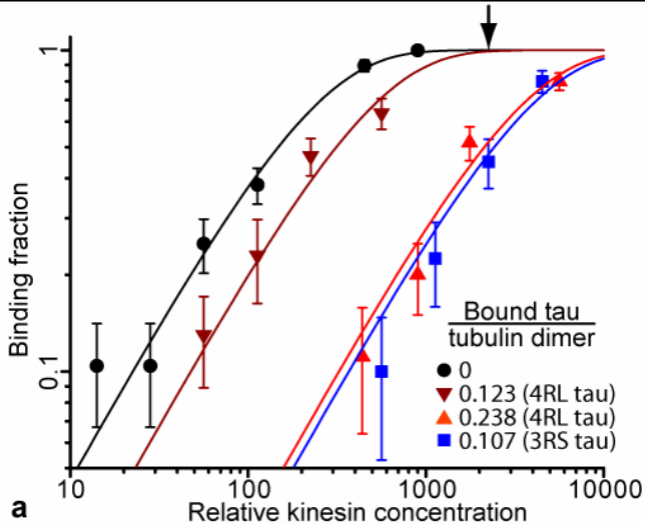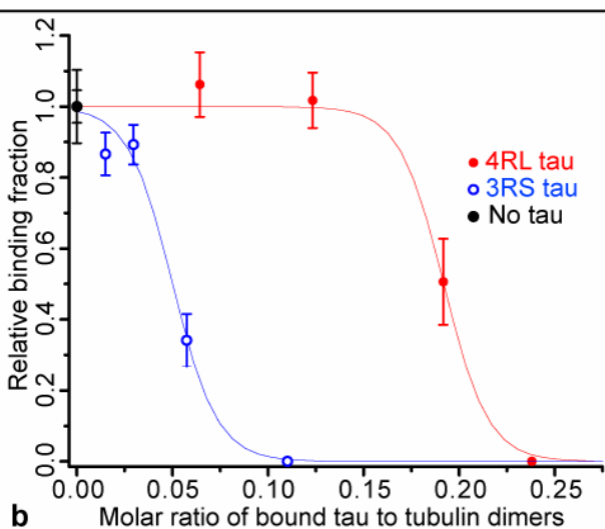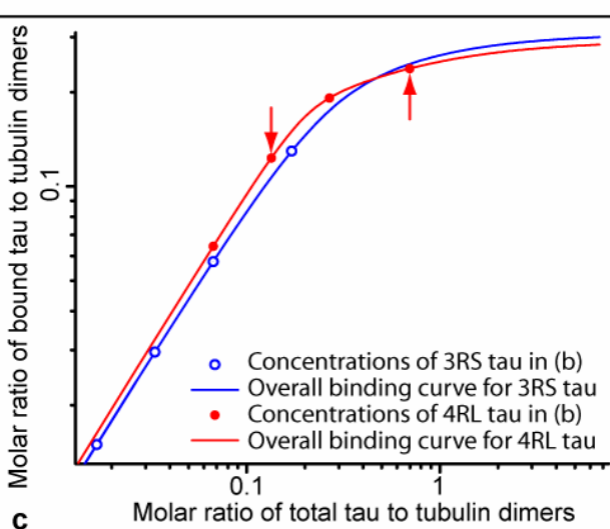

Supplement: pnas_0607919104_3.pdf [file pnas_0607919104_3.pdf]

3R 4R

kDa

75—

50—

25—

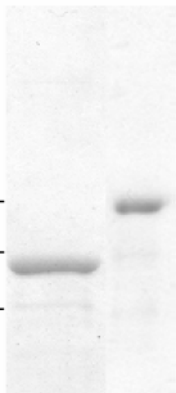

A

Kinesin

kDa

150—

100—

66—

45—

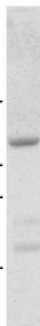

B

Supplement: pnas_0607919104_4.pdf [file pnas_0607919104_4.pdf]

I    II                      III    IV

—  
kDa

—75

—50

—

—

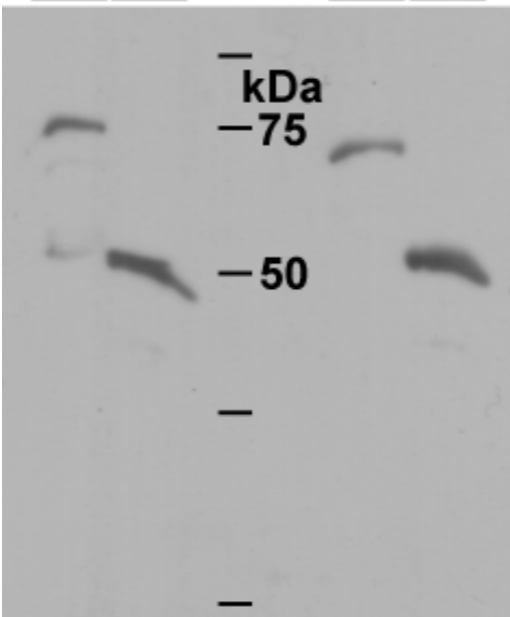

Supplement: pnas_0607919104_5.pdf [file pnas_0607919104_5.pdf]

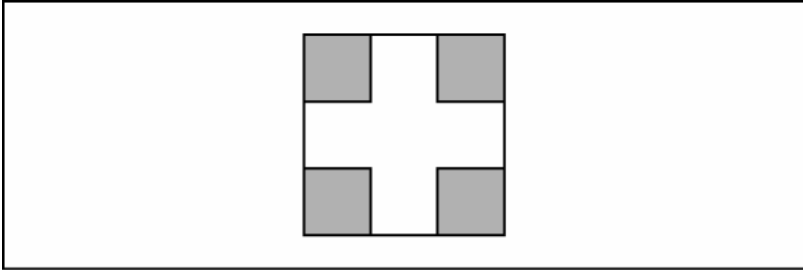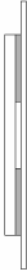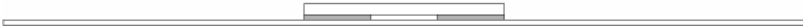

Supplement: pnas_0607919104_6.pdf [file pnas_0607919104_6.pdf]

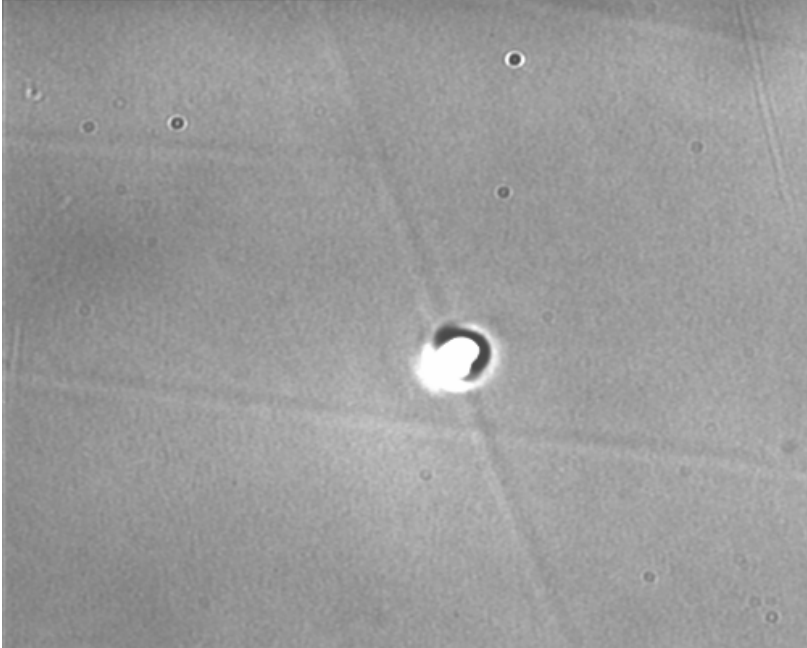

Supplement: pnas_0607919104_7.pdf [file pnas_0607919104_7.pdf]
